# Supplementary material for: Investigating the sexual transmission of Zika virus
Source: PubMed Central journal article supplement — Lancet Glob Health. Author manuscript; Available in PMC 2019 Aug 29. (PMC6713899; doi:10.1016/s2214-109x(17)30419-9), 2018-01
Supplement: NIHMS1009919-supplement-Supplementary_Appendix.pdf [file NIHMS1009919-supplement-Supplementary_Appendix.pdf]

# THE LANCET

## Global Health

### Supplementary appendix

This appendix formed part of the original submission and has been peer reviewed.  
We post it as supplied by the authors.

Supplement to: Kim CR, Counotte M, Bernstein K, et al. Investigating the sexual transmission of Zika virus. *Lancet Glob Health* 2018; **6**: e24–25.

## Appendix for “Investigating the sexual transmission of Zika virus”

### Sexual Transmission Framework

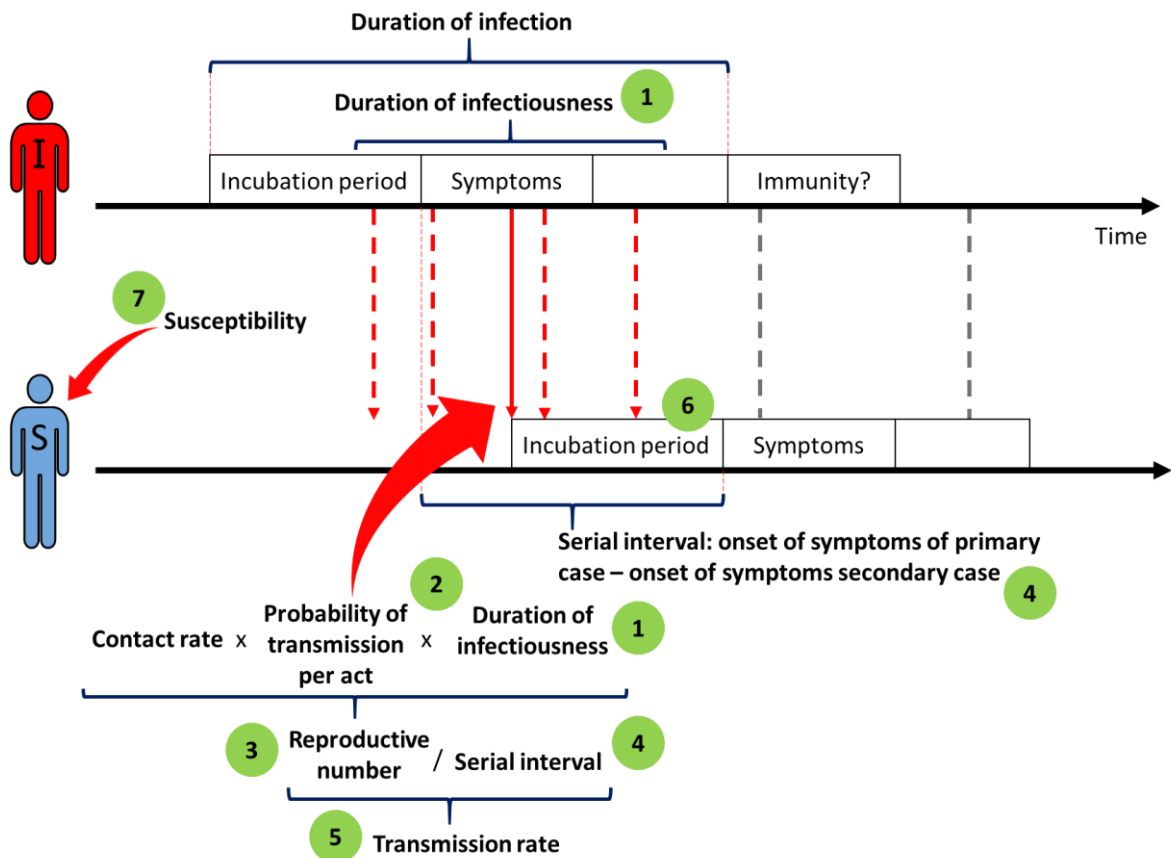

A schematic representation of the sexual transmission of ZIKV and its key parameters. The time course of the disease is illustrated on the horizontal line for the primary case (I) and the secondary case (S). The incubation period can be followed by symptomatic disease; an individual can be infectious (1) during both. After the infection, individuals can become immune. The sexual contact between primary case and a susceptible (7), secondary case is illustrated with vertical arrows and lines. The red dotted arrows (—→) represent sexual acts during the infectious period that do not lead to infection, the red full arrow (→) represents a transmission of ZIKV; the grey dotted lines (— —) represent acts outside of the infectious period and do not contribute to the probability of transmission. The reproductive number (3) is the result of the contact rate, the probability of transmission per act (2) and the duration of infectiousness (1). The transmission rate (5) can be estimated using the reproductive number (3) and the serial interval (4).

### Sexual Transmission of Zika virus Expert Meeting participants:

Emma Aarons, Public Health England  
 Laith Abu-Raddad, Cornell University in Qatar  
 Christian Althaus, University of Bern, Switzerland  
 Luisa Barzon, University of Padova, Italy  
 Ana Bispo, Fundação Oswaldo Cruz (FIOCRUZ), Brazil  
 Maeve Brito de Mello, Pan-American Health Organization (PAHO)  
 Louis Bujan, University Hospital, Toulouse, France  
 Aaron Brault, Centers for Disease Control and Prevention, USA  
 Guilherme Calvet, Fundação Oswaldo Cruz (FIOCRUZ), Brazil  
 Hernando Gaitan-Duarte, National University of Colombia  
 Khalil Ghanem, John Hopkins University, USA

Rodolfo Gomez Ponce de Leon, CLAP WRH, PAHO/WHO  
Ralph Huits, Institute of Tropical Medicine, Belgium  
Susan Hills, Centers for Disease Control and Prevention, USA  
John Kaldor, University of New South Wales, Australia  
Edna Kara, WHO  
Tippawan Liabsuetrakul, Prince of Songkla University, Thailand  
Ornella Lincetto, WHO  
Otilia Mardh, European Centre for Disease Prevention and Control  
Dana Meaney-Delman, Centers for Disease Control and Prevention, USA  
Robyn Meurant, WHO  
Jose Moreira, National Institute of Infectious Disease, Brazil  
Bernadette Murgue, WHO  
Francis Ndowa, Senior International Consultant on STI and Gonococcal Antimicrobial Resistance, Zimbabwe  
Gabriela Paz-Bailey, Centers for Disease Control and Prevention, USA  
Cristina Pimental, Ministry of Health, Brazil  
Joackim Rocklov, Umea University ,Sweden  
Omar Sued, Fundacion Huesped, Argentina  
Anna Thorson, WHO  
Margreet te Wierik, National Institute for Public Health and the Environment/RIVM, Netherlands  
Sina Zintzmeyer, WHO

#### **WHO Zika Sexual Transmission Framework Working Group**

Nicola Low, ISPM Bern (Lead)  
Michel Counotte, ISPM Bern (Lead)  
Nathalie Broutet, WHO (Lead)  
Kyle Bernstein, CDC  
John Brooks, CDC  
Carolyn Deal, NIH  
Edna Kara, WHO  
Caron Kim, WHO

#### **Working group on the Sexual transmission of ZIKV generic protocol**

Gabriela Paz-Bailey, CDC (Lead)  
Hernando Gaitan Duarte, National University of Colombia (Lead)  
Nathalie Broutet, WHO  
Edna Kara, WHO  
Caron Kim, WHO  
John Kaldor, University of New South Wales, Australia  
Nicola Low, ISPM Bern  
Philippe Mayaud, LSHTM  
Margreet te Wierik, RIVM
